# Supplementary figures and images for: SUN-MKL1 Crosstalk Regulates Nuclear Deformation and Fast Motility of Breast Carcinoma Cells in Fibrillar ECM Microenvironment
Source: MDPI journal article supplement (doi:10.3390/cells10061549), 2021-06-19

# Full blot images for Figure 6(C)

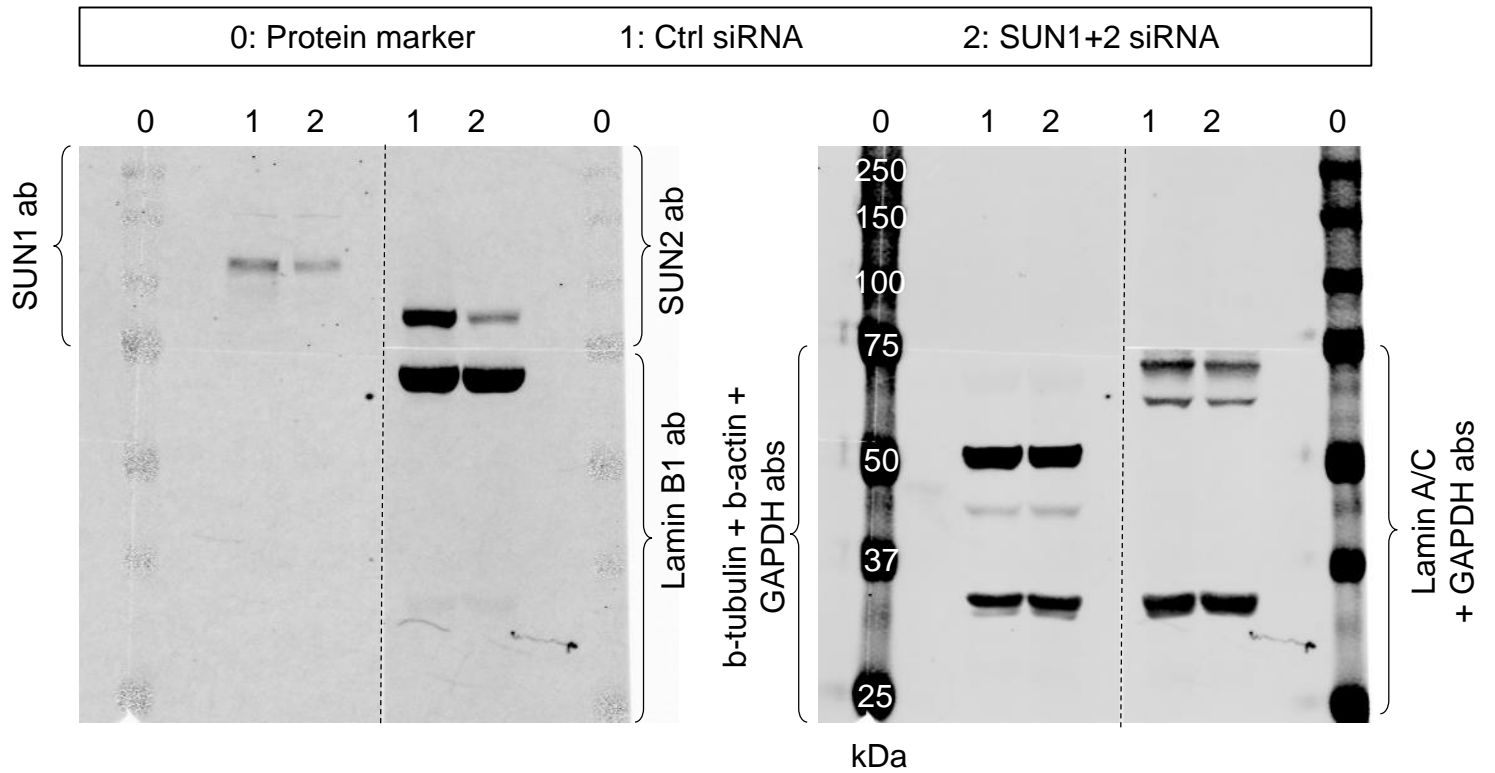

## Full blot images for Figure 7(F)

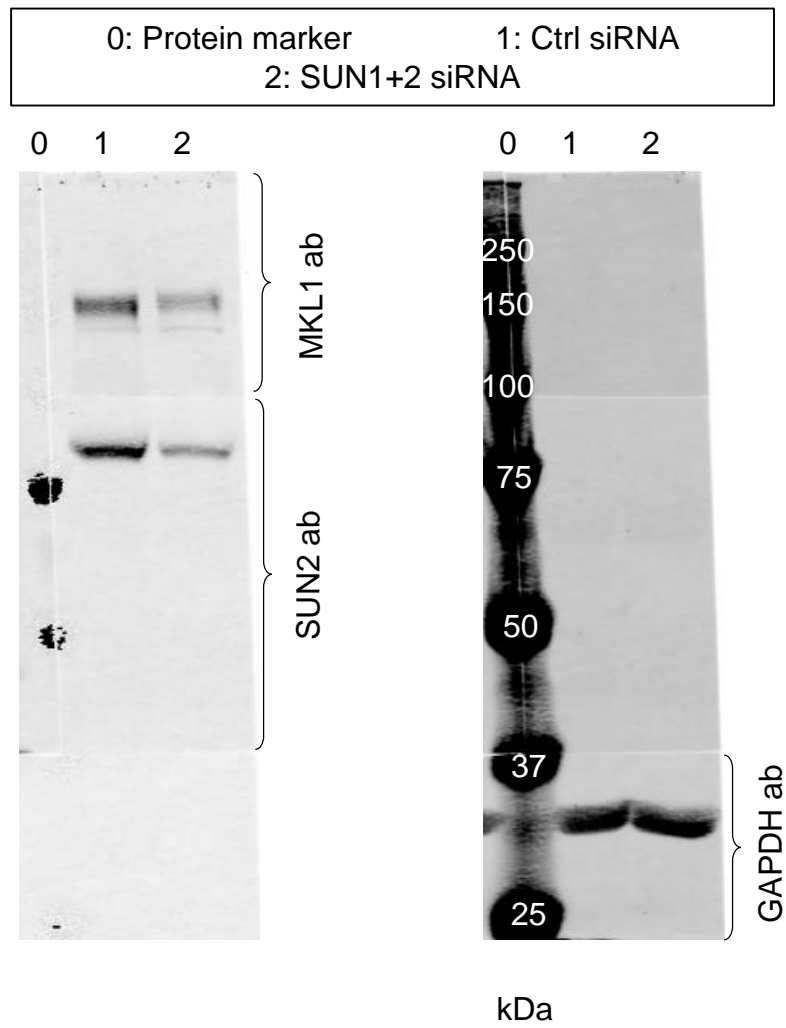

# Full blot images for Figure S5(A)

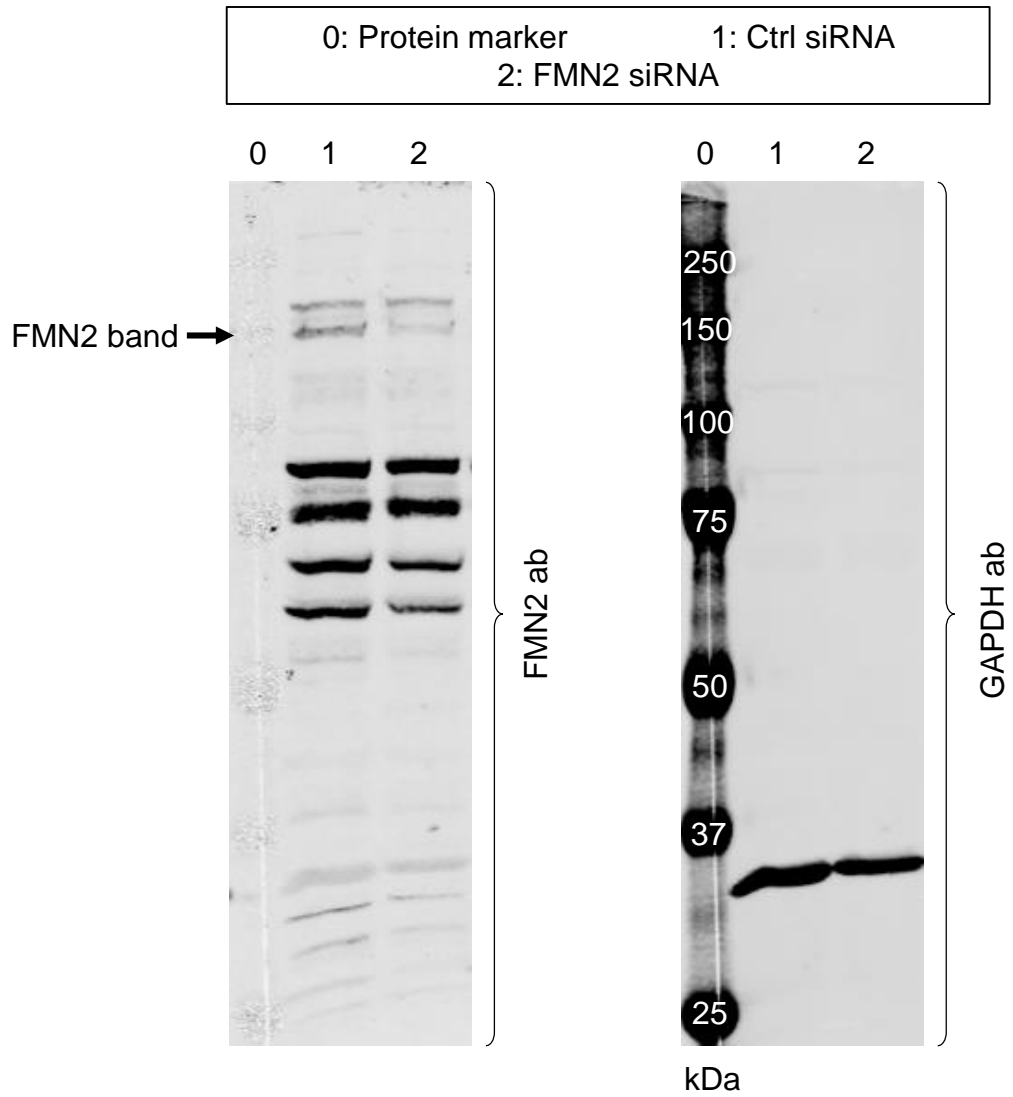

Supplement: s1 [file s1]
